# Supplementary material
Source: publisher site journal article supplement (https://www.spandidos-publications.com/1534/downloadSupplementary)
Supplement: Supplementary file 1 [file downloadSupplementary]

## Sheet: Up_GO
Table SIII. GO term and KEGG pathway enrichment analyses of DEGs.
Category	Term	Count	%	P-value	Genes	List Total	Pop Hits	Pop Total	Fold Enrichment	Bonferroni	Benjamini	FDR
GOTERM_BP_DIRECT	GO:0006955~immune response	50	11.7647	4.27102e-21	PXDN, CD8A, HLA-DMB, HLA-DMA, C1QC, CXCL10, CD96, APLN, GZMA, TNFRSF14, CD40, CTSS, HLA-B, GZMH, HLA-E, HLA-DQA1, HLA-F, CD36, TNFSF13B, CST7, HLA-DPA1, GBP2, HLA-DRA, HLA-DQB1, HLA-DQB2, LST1, ENPP2, C3, ENPP3, CXCL9, IL32, CD70, CCL5, TNFRSF4, CCL28, CD74, TNFRSF1B, CCL20, FCGR1B, HLA-DRB4, HLA-DPB1, CD27, FYB, TNFSF9, TRIM22, VAV1, AIM2, CCL18, RGS1, ADAMDEC1	388	421	16792	5.13995	9.59271e-18	9.59271e-18	7.4427e-18
GOTERM_CC_DIRECT	GO:0005886~plasma membrane	162	38.1176	1.82861e-14	QRFPR, ADORA3, ADCY7, OSMR, SLC6A3, JAG2, CD53, TLR7, BTK, SEZ6L2, APOB, DIRAS2, DYSF, MALL, SLC2A3, FAP, SLC2A1, SERPINE1, TGFBI, MLKL, PAG1, F12, CD3D, APOLD1, TNFRSF14, HLA-B, CD40, HLA-E, SIRPA, HLA-DQA1, HLA-G, HLA-F, BTN3A1, DOC2A, CD36, CPE, LPAR5, CD300LF, HLA-DPA1, SLC38A1, EMP3, BTN3A2, GBP1, HLA-DRA, PHKA2, ITGAL, CAV2, CAV1, ENPP2, CD70, ITGB2, ABCA1, AFAP1L1, KCNJ2, CD74, ADA, P2RY8,…	412	4121	18224	1.73884	5.89861e-12	5.89861e-12	2.47469e-11
GOTERM_CC_DIRECT	GO:0005615~extracellular space	78	18.3529	2.20421e-14	CTHRC1, PXDN, PGF, LY86, EDN1, FSTL3, C1QC, CXCL10, APOB, HIST1H2BK, FAP, HMOX1, TGFBI, SERPINE1, TGFA, LGI4, SERPINA1, LOX, PDGFD, APLN, ANGPT2, ICAM1, F12, STC2, LY96, GNLY, LYZ, CD40, CTSS, VASH1, PTHLH, INHBB, TNFAIP6, CD36, TNFSF13B, ADM, CPE, CST7, PLXDC1, VEGFA, VCAN, LAMC1, COL1A1, LCP1, SPINK13, MFNG, C3, ENPP2, CXCL9, CD70, IL32, CCL5, CCL28, ADA, TIMP1, CCL20, RNASET2, ENO2, ANGPTL2, S…	412	1347	18224	2.56138	7.11409e-12	3.55704e-12	2.98428e-11
GOTERM_CC_DIRECT	GO:0009986~cell surface	45	10.5882	1.8233e-13	ITGAL, PPFIA4, SLC6A3, TRPV2, CSPG4, TLR3, ITGB2, PLVAP, CD53, HLA-DMA, TNFRSF4, CD74, CDH5, ADA, SLC1A4, KISS1R, SLC1A3, PROCR, CXCR4, FAP, CD2, TGFA, FCER1G, SCARB1, HLA-DPB1, TYROBP, CSF1R, ICAM1, LGALS1, NLGN1, AXL, HILPDA, HLA-B, SPARC, CD40, ITGA4, HLA-E, ANXA4, CD1D, HLA-F, CD36, ITGA5, VEGFA, HLA-DPA1, HLA-DRA	412	542	18224	3.67248	5.87002e-11	1.95667e-11	2.46236e-10
GOTERM_CC_DIRECT	GO:0005887~integral component of plasma membrane	76	17.8824	2.30147e-12	QRFPR, CD8A, SLC6A3, TRPV2, JAG2, CSPG4, GJA1, TLR3, CD52, CD53, TLR7, SLC1A4, CD96, KISS1R, SLC2A3, SLC2A1, TGFA, PAG1, ICAM1, TNFRSF14, HLA-B, CD40, SSPN, HLA-DQA1, CD163, CD84, CD37, CD36, HLA-DPA1, SLC38A1, HLA-DRA, CAV2, CAV1, ENPP2, ENPP3, CD70, FPR3, ABCA1, FXYD5, KCNJ2, TNFRSF4, CDH4, GPR4, P2RY8, TNFRSF1B, LAPTM5, PROCR, TAP1, HLA-DRB4, CD2, FCER1G, SCARB1, ENTPD1, PLXND1, GAL3ST1, CD27,…	412	1415	18224	2.37577	7.41081e-10	1.8527e-10	3.10866e-09
GOTERM_CC_DIRECT	GO:0005576~extracellular region	82	19.2941	3.80955e-12	CD8A, PGF, CXORF36, EDN1, FSTL3, CSPG4, IL4I1, C1QC, CXCL10, APOB, SERPINE1, TGFBI, LGI4, PLA1A, SERPINA1, LOX, PDGFD, CASP1, APLN, ANGPT2, F12, STC2, GZMA, OLFML2B, APOLD1, LYZ, CTSS, CD163, C1QA, INHBB, PTHLH, C1QB, GZMK, TNFSF13B, ADM, PLXDC1, VEGFA, PLA2G7, VCAN, LAMC1, COL1A1, TREM2, GBP1, PRF1, C3, CXCL9, APOC1, NMB, TMEM155, ESM1, CCL5, CCL28, TIMP1, TNFRSF1B, PLIN2, PROCR, CCL20, NPTX2, R…	412	1610	18224	2.25286	1.22666e-09	2.45332e-10	5.14556e-09
GOTERM_CC_DIRECT	GO:0071556~integral component of lumenal side of endoplasmic reticulum membrane	12	2.82353	1.61458e-11	HLA-DQB1, HLA-DQB2, HLA-DRB4, HLA-DPA1, HLA-B, HLA-DPB1, HLA-E, HLA-DQA1, CD74, HLA-G, HLA-DRA, HLA-F	412	29	18224	18.3033	5.19893e-09	8.66489e-10	2.18083e-08
GOTERM_BP_DIRECT	GO:0030198~extracellular matrix organization	25	5.88235	2.55033e-11	ICAM1, ITGAL, HAPLN1, COL4A2, PXDN, COL4A1, OLFML2B, OLFML2A, ITGB2, SPARC, ITGA4, COL5A3, COL5A2, VWF, LAMA4, ITGA5, PECAM1, SERPINE1, TGFBI, VCAN, COL1A1, LAMC1, LOX, COL8A1, FN1	388	196	16792	5.5202	5.72803e-08	1.90934e-08	4.44421e-08
GOTERM_BP_DIRECT	GO:0060333~interferon-gamma-mediated signaling pathway	16	3.76471	5.93418e-11	HLA-DQB1, ICAM1, HLA-DQB2, HLA-B, HLA-E, TRIM22, HLA-G, HLA-DQA1, HLA-F, FCGR1B, HLA-DRB4, HLA-DPA1, HLA-DPB1, GBP2, HLA-DRA, GBP1	388	71	16792	9.75287	1.33282e-07	3.33205e-08	1.03409e-07
GOTERM_CC_DIRECT	GO:0009897~external side of plasma membrane	25	5.88235	9.89767e-11	ICAM1, IL2RB, CD8A, NLGN1, CXCL9, TNFRSF14, ABCA1, CD40, MCAM, CD74, CDH5, ADA, ABCG1, CXCL10, CDH13, P2RX7, CD36, ITGA5, PECAM1, CD2, HLA-DRB4, FCER1G, CLEC14A, CD27, LAG3	412	213	18224	5.19167	3.18705e-08	4.55293e-09	1.33689e-07
GOTERM_CC_DIRECT	GO:0042613~MHC class II protein complex	10	2.35294	5.30758e-10	HLA-DQB1, HLA-DQB2, HLA-DRB4, HLA-DPA1, HLA-DPB1, HLA-DMB, HLA-DMA, HLA-DQA1, CD74, HLA-DRA	412	22	18224	20.1059	1.70904e-07	2.1363e-08	7.16903e-07
GOTERM_CC_DIRECT	GO:0012507~ER to Golgi transport vesicle membrane	13	3.05882	1.34845e-09	HLA-DQB1, HLA-DQB2, HLA-DRB4, TGFA, HLA-DPA1, HLA-B, HLA-DPB1, HLA-E, HLA-DQA1, CD74, HLA-G, HLA-DRA, HLA-F	412	52	18224	11.0583	4.342e-07	4.82445e-08	1.82137e-06
GOTERM_BP_DIRECT	GO:0006954~inflammatory response	32	7.52941	1.08066e-09	ITGAL, C3, LY86, PTGS1, CXCL9, TLR3, FPR3, ITGB2, CCL5, TLR7, TNFRSF4, CXCL10, TNFRSF1B, CCL20, CXCR4, PYCARD, CD27, CSF1R, SCG2, GBP5, LY96, AXL, LYZ, TNFRSF14, IFI16, CD40, LGALS9, AIM2, CCL18, TNFAIP6, P2RX7, CYBB	388	379	16792	3.65411	2.42716e-06	4.85433e-07	1.88316e-06
GOTERM_BP_DIRECT	GO:0002504~antigen processing and presentation of peptide or polysaccharide antigen via MHC class II	9	2.11765	1.50163e-09	HLA-DQB1, HLA-DQB2, HLA-DRB4, HLA-DPA1, HLA-DPB1, HLA-DMB, HLA-DMA, HLA-DQA1, HLA-DRA	388	17	16792	22.9121	3.37266e-06	5.62111e-07	2.61675e-06
GOTERM_BP_DIRECT	GO:0050900~leukocyte migration	18	4.23529	2.90607e-09	ICAM1, ITGAL, CAV1, ITGB2, FPR3, ITGA4, SIRPA, CD74, CD84, APOB, PROCR, ITGA5, PECAM1, CD2, FCER1G, COL1A1, ANGPT2, FN1	388	122	16792	6.38533	6.52701e-06	9.32433e-07	5.06413e-06
GOTERM_BP_DIRECT	GO:0019882~antigen processing and presentation	13	3.05882	3.40212e-09	HLA-DQB1, CD8A, CTSS, HLA-B, HLA-DMB, HLA-E, HLA-G, CD74, HLA-DQA1, HLA-DRB4, HLA-DPA1, HLA-DPB1, HLA-DRA	388	55	16792	10.2294	7.64113e-06	9.55145e-07	5.92855e-06
GOTERM_MF_DIRECT	GO:0042605~peptide antigen binding	10	2.35294	6.68896e-09	HLA-DQB1, TAP1, HLA-DRB4, HLA-DPA1, HLA-B, HLA-DPB1, HLA-E, HLA-DQA1, HLA-DRA, HLA-F	383	28	16881	15.7413	4.06019e-06	4.06019e-06	9.89477e-06
GOTERM_MF_DIRECT	GO:0032395~MHC class II receptor activity	8	1.88235	1.58333e-08	HLA-DQB1, HLA-DQB2, HLA-DRB4, HLA-DPA1, HLA-DPB1, HLA-DMA, HLA-DQA1, HLA-DRA	383	15	16881	23.507	9.61076e-06	4.80539e-06	2.34217e-05
GOTERM_BP_DIRECT	GO:0031295~T cell costimulation	14	3.29412	2.40748e-08	HLA-DQB1, HLA-DQB2, CAV1, CD3D, LGALS1, CD247, TNFRSF14, VAV1, HLA-DQA1, TNFSF13B, HLA-DRB4, HLA-DPA1, HLA-DPB1, HLA-DRA	388	78	16792	7.76791	5.40706e-05	6.00799e-06	4.19529e-05
GOTERM_BP_DIRECT	GO:0007155~cell adhesion	33	7.76471	2.76078e-08	ITGAL, ITGB2, IL32, CDH4, CDH5, CDH6, CD96, FAP, TGFBI, CD2, COL8A1, ENTPD1, FN1, PARVG, ICAM1, HAPLN1, NLGN1, ITGA4, PCDH17, SSPN, MCAM, SIRPA, VWF, TNFAIP6, CDH13, LAMA4, CD36, CD300A, ITGA5, PECAM1, VCAN, COL1A1, LAMC1	388	459	16792	3.11152	6.20053e-05	6.2007e-06	4.81096e-05
GOTERM_BP_DIRECT	GO:0050776~regulation of immune response	20	4.70588	3.05662e-08	ICAM1, ITGAL, CD8A, CD3D, C3, CD247, ITGB2, HLA-B, CD40, ITGA4, HLA-E, HLA-G, CD1D, HLA-F, CD96, CD300A, CD300LF, COL1A1, TREM2, TYROBP	388	178	16792	4.86274	6.86492e-05	6.24103e-06	5.32647e-05
GOTERM_CC_DIRECT	GO:0030658~transport vesicle membrane	10	2.35294	1.26313e-07	HLA-DQB1, HLA-DQB2, SCGN, CPE, HLA-DRB4, HLA-DPA1, HLA-DPB1, HLA-DQA1, CD74, HLA-DRA	412	38	18224	11.6403	4.06721e-05	4.06729e-06	0.000170613
GOTERM_MF_DIRECT	GO:0005102~receptor binding	27	6.35294	1.4156e-07	CAV1, C3, DIAPH2, SLC6A3, GJA1, CD70, ABCA1, CDH5, BTK, CXCL10, SERPINE1, CD2, ANGPTL2, ANGPT2, APLN, TYROBP, FYB, HILPDA, HLA-B, TNFSF9, HLA-E, HLA-G, HLA-F, P2RX7, LAMA4, TNFSF13B, ADM	383	353	16881	3.37123	8.59232e-05	2.86419e-05	0.000209405
GOTERM_CC_DIRECT	GO:0000139~Golgi membrane	36	8.47059	2.14357e-07	HLA-DQB1, CAV2, HLA-DQB2, CAV1, LST1, TLR3, GJA1, TLR7, CD74, MALL, LPCAT1, SLC2A1, HLA-DRB4, TGFA, SERPINA1, CHST15, PDGFD, HLA-DPB1, GAL3ST1, GBP5, FUT11, HLA-B, HLA-E, ERGIC1, HLA-DQA1, HLA-G, ABCG1, HLA-F, CHSY3, ST8SIA4, HLA-DPA1, GBP4, PMEPA1, GBP2, GBP1, HLA-DRA	412	591	18224	2.6944	6.90206e-05	6.27479e-06	0.000289535
GOTERM_CC_DIRECT	GO:0030666~endocytic vesicle membrane	12	2.82353	2.36842e-07	HLA-DQB1, HLA-DQB2, CAV1, CD36, HLA-DRB4, SCARB1, HLA-DPA1, HLA-DPB1, HLA-DQA1, CD74, HLA-DRA, CD163	412	66	18224	8.04237	7.62602e-05	6.35524e-06	0.000319906
GOTERM_CC_DIRECT	GO:0030669~clathrin-coated endocytic vesicle membrane	10	2.35294	2.55692e-07	HLA-DQB1, HLA-DQB2, APOB, FCGR1B, HLA-DRB4, HLA-DPA1, HLA-DPB1, HLA-DQA1, CD74, HLA-DRA	412	41	18224	10.7885	8.23293e-05	6.33327e-06	0.000345366
GOTERM_BP_DIRECT	GO:0001666~response to hypoxia	18	4.23529	4.96475e-07	CAV1, LDHA, NOL3, PGF, APOLD1, EGLN3, BNIP3, ADA, DDIT4, CA9, ADM, CXCR4, PLOD2, HMOX1, VEGFA, CASP1, ANGPT2, ANGPTL4	388	172	16792	4.52913	0.00111446	9.29194e-05	0.000865157
GOTERM_CC_DIRECT	GO:0070062~extracellular exosome	102	24	7.17011e-07	LDHA, PTGS1, CSPG4, CD53, C1QC, APOB, DYSF, PLOD2, SLC2A3, PLOD3, TGFBI, SERPINE1, SLC2A1, PLA1A, PDGFD, F12, FUT11, HLA-B, CD40, HLA-E, SIRPA, C1QA, C1QB, CD37, CPE, SLC38A1, LAMC1, HLA-DRA, ITGAL, ENPP3, ALDOC, APOC1, ITGB2, CD70, CD74, TIMP1, DOCK2, PROCR, RAC2, SCARB1, ENTPD1, ANGPTL2, ARHGDIB, FN1, HPCAL1, LGALS1, FSCN1, MYO1G, NCKAP1L, S100A10, ITGA4, LGALS9, PSMB9, CORO1A, LAMA4, CD300A, M…	412	2811	18224	1.60504	0.000230851	1.64911e-05	0.000968474
GOTERM_CC_DIRECT	GO:0016020~membrane	85	20	7.25749e-07	LDHA, PGF, TLR3, CD52, HLA-DMA, SLC1A4, SLC1A3, HMOX1, SLC2A1, ICAM1, NOL3, GBP5, PFKP, GZMB, HLA-B, IFI16, HLA-E, GZMH, SIRPA, ERGIC1, HLA-DQA1, HLA-G, CD163, HLA-F, CCND1, CD37, CD36, DOC2A, TNFSF13B, VEGFA, VCAN, EMP3, BTN3A2, MELK, HLA-DQB1, CAV2, PRF1, ITGAL, CAV1, MFNG, LST1, LMNB1, CD247, HK2, IL32, ITGB2, CEP55, FXYD5, CD74, ADA, CDH5, IKBIP, RAB42, DOCK2, LPCAT1, RAC2, NCAPG, TAP1, STAMB…	412	2200	18224	1.709	0.000233664	1.55793e-05	0.000980276
GOTERM_BP_DIRECT	GO:0032496~response to lipopolysaccharide	17	4	1.28142e-06	LY96, EDN1, CXCL9, TNFRSF14, IDO1, CD40, SPARC, TNFRSF4, LGALS9, CXCL10, CD96, P2RX7, APOB, ADM, IL10RA, CASP1, CD27	388	164	16792	4.48617	0.00287393	0.000221365	0.00223298
GOTERM_BP_DIRECT	GO:0051607~defense response to virus	17	4	1.38963e-06	PRF1, CD8A, CXCL9, BNIP3, TLR3, APOBEC3G, IFI44L, CD40, IFI16, TRIM22, TLR7, APOBEC3C, DDIT4, ISG20, CXCL10, PYCARD, GBP1	388	165	16792	4.45898	0.00311624	0.000222911	0.00242154
GOTERM_BP_DIRECT	GO:2000406~positive regulation of T cell migration	6	1.41176	1.45179e-06	CCL20, PYCARD, TNFRSF14, ITGA4, CCL5, CXCL10	388	10	16792	25.967	0.00325542	0.000217359	0.00252987
GOTERM_MF_DIRECT	GO:0042803~protein homodimerization activity	38	8.94118	4.04937e-06	CAV2, CD8A, PGF, CD247, BNIP3, APOBEC3G, PLVAP, CCL5, TYMS, TRIM9, HMOX1, FAP, TAP1, CD2, PYCARD, SCARB1, TCF4, BHLHE41, TOP2A, CSF1R, STC2, PLEK, GZMA, LGALS1, S100A10, OLFML2A, KCNK3, ABCG1, HLA-G, INHBB, VWF, CDH13, C1QB, P2RX7, CORO1A, PYGL, SDS, VEGFA	383	730	16881	2.29435	0.00245495	0.000614305	0.00598994
GOTERM_BP_DIRECT	GO:0006935~chemotaxis	14	3.29412	4.8037e-06	LSP1, DOCK2, TYMP, RAC2, CCL20, ENPP2, CXCR4, CXCL9, NCKAP1L, CCL5, CCL28, CCL18, LGALS9, CXCL10	388	122	16792	4.96637	0.0107311	0.000674093	0.00837062
GOTERM_CC_DIRECT	GO:0016021~integral component of membrane	158	37.1765	7.88056e-06	QRFPR, LDHA, ADORA3, ADCY7, OSMR, SLC6A3, CSPG4, TLR3, CD52, CD53, TLR7, TMEM140, SEZ6L2, DYSF, MALL, SLC2A3, FAP, SLC2A1, MS4A7, CD3D, FUT11, APOLD1, TNFRSF14, HLA-B, CD40, HLA-E, ERGIC1, SIRPA, HLA-DQA1, HLA-G, HLA-F, LHFPL2, CD37, BTN3A1, CD36, LPAR5, SPAG4, CD300LF, HLA-DPA1, CDCA7L, COL1A1, SLC38A1, EMP3, BTN3A2, HLA-DRA, NETO2, CAV2, ITGAL, CAV1, LST1, RTP4, ENPP2, ENPP3, CD70, FXYD5, CD74,…	412	5163	18224	1.35363	0.00253433	0.000158584	0.0106439
GOTERM_BP_DIRECT	GO:0019886~antigen processing and presentation of exogenous peptide antigen via MHC class II	12	2.82353	8.53598e-06	HLA-DQB1, HLA-DQB2, HLA-DRB4, FCER1G, HLA-DPA1, CTSS, HLA-DPB1, HLA-DMB, HLA-DMA, HLA-DQA1, CD74, HLA-DRA	388	92	16792	5.645	0.0189893	0.00112712	0.0148738
GOTERM_CC_DIRECT	GO:0005901~caveola	10	2.35294	1.44667e-05	CDH13, CAV2, CAV1, HMOX1, SLC2A1, SCARB1, PLVAP, PRKCDBP, EHD2, MYOF	412	65	18224	6.80508	0.00464748	0.000273981	0.0195387
GOTERM_MF_DIRECT	GO:0005201~extracellular matrix structural constituent	10	2.35294	1.90043e-05	HAPLN1, COL4A2, LAMA4, PXDN, COL4A1, VCAN, COL1A1, LAMC1, COL5A3, COL5A2	383	67	16881	6.57847	0.0114694	0.00230449	0.0281088
GOTERM_BP_DIRECT	GO:0033209~tumor necrosis factor-mediated signaling pathway	13	3.05882	1.79434e-05	PSMB10, TNFRSF1B, TNFSF13B, PYCARD, TNFRSF14, PLVAP, CD70, CD40, BIRC3, TNFRSF4, CD27, AIM2, PSMB9	388	118	16792	4.76795	0.0394999	0.00223645	0.0312636

## Sheet: Down_GO
Category	Term	Count	%	P-value	Genes	List Total	Pop Hits	Pop Total	Fold Enrichment	Bonferroni	Benjamini	FDR
GOTERM_CC_DIRECT	GO:0070062~extracellular exosome	203	37.1795	8.11857e-40	ALDH8A1, PGAM2, SELENBP1, BBOX1, AQP2, AIF1L, APOH, RAB25, APOM, MUC13, CRYAA, SUCLG1, PTPRO, RHCG, F3, BHMT, ABAT, SH3GL2, GC, ENPP6, RBP4, ACADSB, ALDOB, PTH1R, MME, ACAT1, GPD1L, PFN2, PLAT, GPD1, FBXO2, GGH, C16ORF89, PTPN13, ACPP, GGT6, C1ORF116, SFRP1, FAM151A, DUSP26, TGFBR3, QPRT, GK, PLAU, ARSF, FGF9, NPNT, FAM3B, SUSD2, SPINK1, EFHD1, SLC23A1, SERPINA5, SERPINA4, SLC22A6, ATP6V0D2, DPEP…	521	2811	18224	2.52605	2.63042e-37	2.63042e-37	1.09761e-36
GOTERM_CC_DIRECT	GO:0016323~basolateral plasma membrane	34	6.22711	9.47158e-18	CLDN8, PALM, CLDN19, ENPP1, ERBB4, SLC16A10, PTH1R, RHBG, SLC7A8, UMOD, KCNJ10, ATP6V1B1, ATP12A, AQP2, SLC7A7, EPCAM, ANK2, MARVELD2, FOLR1, SLC22A6, SLC39A5, SLC4A1, SLC22A7, SLC22A8, ATP1A1, MTTP, BSND, SLC4A11, PROM2, RHCG, SLC26A7, CA4, CA2, HPGD	521	180	18224	6.60712	3.06879e-15	1.5344e-15	1.28053e-14
GOTERM_CC_DIRECT	GO:0016324~apical plasma membrane	42	7.69231	1.89418e-17	SHROOM3, SLC22A13, MAL2, SLC22A12, PTH1R, SLC7A9, UMOD, ATP6V1B1, AQP2, EPCAM, SLC23A1, ANK2, MARVELD2, FOLR1, KCNE1, SCNN1G, SCNN1B, SCNN1A, ATP6V0D2, MUC13, DPEP1, NOX4, MUC1, TRPM6, SLC12A1, SLC12A3, KL, SLC34A1, MAL, ATP1A1, ABCB1, PTPRO, SLC26A4, PROM1, CYP4A11, PROM2, RHCG, SPTBN2, CA4, IGFBP2, ATP6V0A4, SLC5A12	521	291	18224	5.0485	6.13713e-15	2.04571e-15	2.56088e-14
GOTERM_BP_DIRECT	GO:0055114~oxidation-reduction process	54	9.89011	6.86231e-13	TM7SF2, ALDH8A1, CYP24A1, UQCRC1, LDHD, BBOX1, GLDC, CRYL1, MIOX, AKR7A3, DAO, HIGD1A, HPD, NQO2, ALDH6A1, ACADM, QDPR, GRHPR, GMPR, MOXD1, DHDH, HSD11B2, ENOX1, PHYHD1, TYRP1, GLRX5, SORD, CYP1B1, ADHFE1, PIPOX, GPD1L, FMO4, ALDH1A2, FMO5, CYP27B1, ALDH4A1, GSTO2, NOX4, CHDH, MAOA, BCKDHB, IYD, RDH12, CYP4A11, CYP17A1, L2HGDH, AOX1, PHGDH, PRODH2, CYP4F3, DIO1, CYP8B1, HPGD, DCXR	500	592	16792	3.06341	1.54401e-09	1.54401e-09	1.19608e-09
GOTERM_CC_DIRECT	GO:0005759~mitochondrial matrix	38	6.95971	9.10612e-13	ACADSB, GLRX5, ADHFE1, ERBB4, OGDHL, ECHS1, BPHL, AGXT, ACAT1, ACSF2, AUH, GLDC, OXCT1, ARG2, ALDH4A1, HADH, GPT2, ACSM2B, ALDH6A1, ACADM, FECH, SUCLG2, SUCLG1, BCKDHB, ACSM2A, AK3, PCK2, TST, ACSM3, GLYAT, HMGCS2, ALDH1B1, ABAT, AGXT2, HIBCH, PCCB, OAT, PC	521	327	18224	4.06482	2.95036e-10	7.3759e-11	1.23112e-09
GOTERM_BP_DIRECT	GO:0007588~excretion	14	2.5641	2.24082e-11	CLDN16, CLCNKB, UMOD, GRHPR, ATP6V1B1, AQP2, KCNJ1, NPHS2, NPHS1, SCNN1G, NEDD4L, SCNN1B, ATP6V0A4, CLCN5	500	37	16792	12.7075	5.04184e-08	2.52092e-08	3.90566e-08
GOTERM_CC_DIRECT	GO:0005887~integral component of plasma membrane	82	15.0183	1.09083e-09	TM7SF2, SLC5A2, KCNJ15, CASR, TSPAN1, SLC22A13, SLC16A10, SLC22A12, SLC7A8, SLC7A9, TSPAN8, KCNJ10, AQP2, KCNJ13, SLC7A7, IL17RB, EPCAM, GPC5, SLC23A1, GPC3, SLC22A6, SLC4A1, APOM, ZDHHC2, TYRO3, PTGER1, PLXNB1, SLC25A5, SLC22A7, SLC22A8, SLC34A1, PIGR, SLC7A13, PTPRO, CNGA1, SLC26A4, BSND, RHCG, SLC26A7, PALM, FXYD4, ENPP1, PTH1R, RHBG, MME, CLCNKB, BDKRB2, GCGR, TSPAN33, FOLR1, PRRG2, SCNN1G, S…	521	1415	18224	2.02705	3.53428e-07	7.06856e-08	1.47477e-06
GOTERM_CC_DIRECT	GO:0005739~mitochondrion	74	13.5531	4.78911e-08	ACOX2, CYP24A1, UQCRC1, TNNC1, OGDHL, LDHD, GCAT, BPHL, UQCRFS1, BBOX1, GLDC, AUH, SLC25A25, HADH, GPT2, APOO, ACSM2B, ALDH6A1, ACADM, FECH, SUCLG2, ACO1, SLC25A5, SUCLG1, ACSM2A, QDPR, ASB9, ALDH1B1, HAO2, ABAT, G0S2, PCCB, OAT, SLC27A2, GLRX5, ACADSB, CYP1B1, ERBB4, ADHFE1, ECHS1, AGMAT, ACAT1, CYP27B1, HSPA2, CKMT2, ARG2, OXCT1, PACRG, ALDH4A1, KLK6, NDUFA4, NOX4, GPD1, GABARAPL1, MAOA, BCKDHB…	521	1331	18224	1.94473	1.55166e-05	2.58611e-06	6.47475e-05
GOTERM_BP_DIRECT	GO:0006094~gluconeogenesis	11	2.01465	4.91127e-07	GPD1, RBP4, G6PC, SLC25A10, ALDOB, FBP1, PGAM2, PCK2, PPARGC1A, PC, PCK1	500	44	16792	8.396	0.00110442	0.000368277	0.000856012
GOTERM_BP_DIRECT	GO:0008152~metabolic process	20	3.663	6.26353e-07	ACSM2B, ENPP6, ACO1, SUCLG2, SUCLG1, BCKDHB, HOGA1, ACSM2A, EPHX2, GRHPR, MAN1C1, ACAT1, UGT3A1, ACSF2, AUH, ACSM3, GSTM3, OXCT1, PLA2G4F, ACAA1	500	168	16792	3.9981	0.0014083	0.000352262	0.0010917
GOTERM_CC_DIRECT	GO:0031526~brush border membrane	11	2.01465	1.46504e-06	SLC26A4, TRPM6, FOLR1, SLC22A12, ITLN1, PTH1R, SLC34A1, SLC7A9, CA4, ATP6V0A4, MTTP	521	51	18224	7.54447	0.000474562	6.78083e-05	0.00198069
GOTERM_MF_DIRECT	GO:0016491~oxidoreductase activity	21	3.84615	1.73107e-06	NOX4, CYP24A1, SORD, ADHFE1, MAOA, ADH1C, ADH6, PIPOX, DHDH, IYD, ALDH1A2, ALDH1B1, L2HGDH, HAO2, AOX1, ALDH4A1, GSTO2, HPGD, DCXR, NQO2, ENOX1	494	200	16881	3.58807	0.0013597	0.0013597	0.002651
GOTERM_CC_DIRECT	GO:0005615~extracellular space	69	12.6374	2.88108e-06	FGF9, CRHBP, FAM3B, SPINK1, SELENBP1, CXCL12, AZGP1, GPC5, GPC3, CTGF, PAPPA, SERPINA5, PPP1R1A, SOSTDC1, PROZ, SERPINA4, CCBE1, APOH, FGF1, DPEP1, MUC13, IL13RA2, APOO, KNG1, NAPSA, PIGR, SLIT2, PROC, PTGDS, F3, CA2, ENOX1, GC, RBP4, SORD, ENPP1, LUM, C5, SPOCK1, DCN, KIT, ALB, ANGPTL1, EGF, ANGPTL3, DEFB1, DPT, MUC1, PLAT, FLRT3, KLK6, KL, GGH, ACPP, PLG, PROM1, C2ORF40, TST, AFM, SOST, SFRP1, …	521	1347	18224	1.79179	0.000933037	0.000116677	0.00389509
GOTERM_MF_DIRECT	GO:0015301~anion:anion antiporter activity	8	1.4652	2.83581e-06	SLC26A4, SLC4A11, SLC26A7, SLC22A7, SLC22A8, SLC22A6, SLC4A1, SLC4A9	494	23	16881	11.8859	0.00222647	0.00111385	0.00434279
GOTERM_CC_DIRECT	GO:0005782~peroxisomal matrix	10	1.8315	5.03145e-06	ACOX2, HACL1, HAO2, FABP1, DAO, GRHPR, AGXT, PHYH, PIPOX, ACAA1	521	46	18224	7.60411	0.00162887	0.000181116	0.00680219
GOTERM_MF_DIRECT	GO:0030170~pyridoxal phosphate binding	11	2.01465	5.1888e-06	DDC, CTH, ALB, SDSL, GCAT, ABAT, AGXT2, OAT, GPT2, AGXT, GLDC	494	57	16881	6.59461	0.0040701	0.00135855	0.00794605
GOTERM_BP_DIRECT	GO:0034220~ion transmembrane transport	21	3.84615	4.76007e-06	GABRA2, SLC12A1, FXYD4, CLCNKB, ATP1A1, SFXN2, ATP12A, ATP6V1B1, AQP2, ATP6V1C2, BSND, ATP6V0E2, ANO5, NEDD4L, SCNN1G, ATP6V1G3, SCNN1B, ATP6V0A4, SCNN1A, ATP6V0D2, CLCN5	500	210	16792	3.3584	0.010653	0.00213974	0.00829629
GOTERM_MF_DIRECT	GO:0009055~electron carrier activity	13	2.38095	1.16632e-05	ACOX2, NOX4, ACADSB, GLRX5, ACADM, QDPR, DHDH, GLDC, AOX1, PHGDH, AKR7A3, ALDH4A1, NQO2	494	90	16881	4.93596	0.00912545	0.00228921	0.0178601
GOTERM_BP_DIRECT	GO:0001657~ureteric bud development	9	1.64835	1.28163e-05	EPCAM, TCF21, SFRP1, ARG2, NPNT, FOXC1, BMP7, WT1, SLIT2	500	38	16792	7.95411	0.0284251	0.00479463	0.0223361
GOTERM_BP_DIRECT	GO:0045926~negative regulation of growth	7	1.28205	1.30389e-05	MT1M, GPC3, MT1E, MT1H, MT1X, MT1G, MT1F	500	19	16792	12.3731	0.0289116	0.00418234	0.0227239
GOTERM_BP_DIRECT	GO:0055085~transmembrane transport	22	4.0293	1.33763e-05	SLC5A2, SLC12A1, SLC22A13, SLC25A5, SLC16A10, SLC44A4, SLC22A7, MAL, ABCB1, GJB1, SLC47A2, SVOPL, AZGP1, SLC16A5, SLC25A25, SLC23A3, SLC16A9, SLC17A1, SLC13A1, SLC13A3, SLC5A11, SLC5A12	500	244	16792	3.02807	0.0296484	0.00375503	0.0233118
GOTERM_MF_DIRECT	GO:0008483~transaminase activity	6	1.0989	2.20645e-05	ABAT, AGXT2, PSAT1, OAT, GPT2, AGXT	494	13	16881	15.7717	0.0171934	0.00346257	0.0337852
GOTERM_BP_DIRECT	GO:0006631~fatty acid metabolic process	10	1.8315	1.98318e-05	ACSM2B, CYP4A11, CRYL1, ACADSB, ACOT11, ACSM2A, ACOT12, ANGPTL3, HADH, ACSF2	500	52	16792	6.45846	0.0436411	0.00494573	0.0345605
GOTERM_CC_DIRECT	GO:0005578~proteinaceous extracellular matrix	22	4.0293	3.06971e-05	COCH, COL4A4, FLRT3, COL4A3, LUM, NPNT, UMOD, SPOCK1, NDNF, SLIT2, COL4A6, GPC5, GPC3, SOST, SFRP1, CTGF, FBLN5, CCBE1, TGFBR3, FGF1, CHL1, DPT	521	268	18224	2.8714	0.00989673	0.000994108	0.0414938
GOTERM_BP_DIRECT	GO:0006814~sodium ion transport	12	2.1978	2.64787e-05	SLC5A2, SLC23A1, SLC12A1, SLC4A11, SLC12A3, SLC13A1, SLC13A3, NEDD4L, SCNN1G, SCNN1B, SLC5A11, SLC5A12	500	81	16792	4.97541	0.0578379	0.00594008	0.0461414

## Sheet: Up_KEGG
Term	ID	Input number	Background number	P-value	Corrected P-Value	Input
Viral myocarditis	hsa05416	20	60	2.79612e-22	6.2633e-20	958|3689|857|595|3109|3119|3134|3117|3113|3115|3126|3135|3683|5880|5551|3133|3122|3108|3106|3383
Cell adhesion molecules (CAMs)	hsa04514	24	146	3.31728e-20	3.71535e-18	5175|22871|3676|958|3108|3383|3122|3106|3126|914|1462|3135|3134|3133|3109|3689|3119|3117|3115|3113|1002|3683|1003|925
Staphylococcus aureus infection	hsa05150	17	57	1.89104e-18	1.41198e-16	2212|3689|3108|3109|3119|718|3117|3113|3115|714|3126|712|713|3683|2359|3122|3383
Allograft rejection	hsa05330	15	39	8.42889e-18	4.72018e-16	958|3108|3109|3119|3134|3117|3126|3115|3113|3135|3122|5551|3133|3002|3106
Phagosome	hsa04145	22	155	2.04913e-17	9.18009e-16	6890|3678|11151|3109|3122|3106|3126|1520|718|3135|3134|3133|3108|2212|3689|3119|948|949|3117|3115|3113|1536
Type I diabetes mellitus	hsa04940	15	44	3.70638e-17	1.38372e-15	3108|3109|3119|3134|3117|3113|3115|3126|3135|3122|5551|1363|3133|3002|3106
Antigen processing and presentation	hsa04612	17	78	1.73225e-16	5.5432e-15	3108|3109|3119|6890|3117|3113|3115|3126|3106|3135|3122|1520|3133|3310|3134|925|972
Autoimmune thyroid disease	hsa05320	15	54	4.79178e-16	1.3417e-14	958|3108|3109|3119|3134|3117|3126|3115|3113|3135|3122|5551|3133|3002|3106
Graft-versus-host disease	hsa05332	14	42	5.46805e-16	1.36094e-14	3108|3109|3119|3134|3117|3113|3115|3126|3135|3122|5551|3133|3002|3106
Rheumatoid arthritis	hsa05323	16	91	2.58962e-14	5.80075e-13	3683|2321|6352|3109|3119|10673|3126|3115|3113|3689|3117|7422|3122|3108|3383|6364
Focal adhesion	hsa04510	21	203	3.40331e-14	6.93038e-13	1284|2321|3915|595|2335|7450|1282|857|3910|858|330|1277|64098|3678|5880|7409|80310|5228|894|3676|7422
HTLV-I infection	hsa05166	23	259	4.04483e-14	7.55035e-13	595|113|958|3108|3109|3122|3106|6513|3126|6688|915|894|3560|3135|3134|3133|3383|3689|3119|3117|3115|3113|3683
Cytokine-cytokine receptor interaction	hsa04060	23	265	6.32489e-14	1.08983e-12	10673|4283|8744|7852|9180|7133|958|2321|53833|970|939|6362|6364|7293|3587|3625|3627|1436|3560|6352|8764|7422|56477
Intestinal immune network for IgA production	hsa04672	13	50	9.08162e-14	1.45306e-12	958|3108|3109|3119|10673|3113|3115|3126|7852|3117|3676|3122|56477
Toxoplasmosis	hsa05145	16	119	1.05728e-12	1.57888e-11	958|3915|23643|3108|3109|3119|3587|3117|3113|3115|3910|3126|330|3122|240|3310
Herpes simplex infection	hsa05168	18	186	6.54377e-12	9.16128e-11	6352|3109|3119|6890|3117|3126|3115|718|3113|7098|3135|3122|8764|3133|3108|3134|3106|972
Asthma	hsa05310	10	32	1.45944e-11	1.92302e-10	958|3108|3109|3119|2207|3117|3113|3115|3126|3122
HIF-1 signaling pathway	hsa04066	14	103	2.43868e-11	3.0348e-10	2321|5163|3939|285|7076|6513|5054|1536|2026|112399|7422|1906|3099|3162
Epstein-Barr virus infection	hsa05169	18	204	2.69624e-11	3.17872e-10	958|953|3383|3119|3587|3117|3113|3115|3126|6688|3135|3683|7431|3133|3122|3310|3134|3106
Tuberculosis	hsa05152	17	179	3.32293e-11	3.72168e-10	2212|3689|11151|3109|3119|3587|3117|3113|3115|2207|3126|4046|3122|1520|3108|718|972
PI3K-Akt signaling pathway	hsa04151	22	342	5.49555e-11	5.86192e-10	595|3678|9180|3676|2321|7450|4515|80310|285|3915|894|3910|54541|57121|1277|1436|1284|3560|5228|2335|1282|7422
Systemic lupus erythematosus	hsa05322	15	136	7.02962e-11	7.15743e-10	2212|3108|3109|3119|958|3117|3113|3115|714|3126|712|85236|713|3122|718
Leishmaniasis	hsa05140	12	74	1.05023e-10	1.02284e-09	2212|3689|3108|3109|3119|718|3117|3113|3115|3126|3122|3676
Influenza A	hsa05164	16	176	2.29329e-10	2.1404e-09	51284|6352|3109|834|29108|3117|3126|3115|3113|3627|3122|7098|3310|3119|3108|3383
Natural killer cell mediated cytotoxicity	hsa04650	13	135	5.96245e-09	5.34236e-08	3689|3383|2207|3683|3106|7305|5880|3135|919|7409|3133|3002|5551
Hematopoietic cell lineage	hsa04640	11	88	7.52738e-09	6.48513e-08	1436|948|951|3126|3122|3678|915|914|3676|925|912
Complement and coagulation cascades	hsa04610	10	79	3.26576e-08	2.70937e-07	5265|7450|718|714|713|3689|712|10544|5054|2161
ECM-receptor interaction	hsa04512	10	82	4.50442e-08	3.60353e-07	1284|3915|2335|948|1282|3910|1277|3678|7450|3676
Pertussis	hsa05133	9	75	2.42325e-07	1.87176e-06	3689|23643|834|718|714|713|712|29108|3678
AGE-RAGE signaling pathway in diabetic complications	hsa04933	10	101	2.70201e-07	2.0175e-06	1284|5054|595|2335|1282|1277|1536|7422|1906|3383
Pathways in cancer	hsa05200	18	397	4.71459e-07	3.40667e-06	1436|1284|3915|112399|595|2335|3910|1282|6688|6513|330|57121|7852|5880|7422|113|7039|5228
Rap1 signaling pathway	hsa04015	13	211	7.72498e-07	5.40748e-06	1436|2321|5228|3683|3689|57568|57121|5880|80310|113|54518|285|7422
Leukocyte transendothelial migration	hsa04670	10	118	1.0168e-06	6.90188e-06	3689|3383|5175|3683|1003|7852|1536|5880|7409|3676
Inflammatory bowel disease (IBD)	hsa05321	8	66	1.06237e-06	6.99915e-06	3108|3109|3119|3117|3126|3115|3113|3122
Primary immunodeficiency	hsa05340	6	37	5.38591e-06	3.44698e-05	958|695|6890|915|100|925
Endocytosis	hsa04144	13	260	6.82737e-06	4.24814e-05	1436|3135|2321|857|30846|9815|3106|858|3560|7852|3134|3133|3310
Chemokine signaling pathway	hsa04062	11	187	8.25918e-06	5.00015e-05	4283|6352|3627|1794|7852|5880|7409|113|6362|56477|6364
Amoebiasis	hsa05146	8	100	1.82487e-05	0.000107571	1284|3689|2335|3910|1282|3915|1277|912
Malaria	hsa05144	6	49	2.30538e-05	0.000132412	958|3689|948|5175|3683|3383
Chagas disease (American trypanosomiasis)	hsa05142	8	104	2.37756e-05	0.000133143	6352|718|714|713|712|5054|919|915
Transcriptional misregulation in cancer	hsa05202	10	180	3.36699e-05	0.000183953	1436|958|2321|894|330|3486|6688|26471|3002|3560
TNF signaling pathway	hsa04668	8	110	3.46519e-05	0.00018481	6352|3383|330|3627|197259|1906|7133|6364
Legionellosis	hsa05134	6	55	4.18974e-05	0.000218256	3689|834|718|664|29108|3310
Small cell lung cancer	hsa05222	7	86	5.50927e-05	0.000280472	1284|3915|595|2335|1282|3910|330
Prion diseases	hsa05020	5	35	5.80207e-05	0.000288814	713|3915|714|6352|712
Platelet activation	hsa04611	8	122	6.90563e-05	0.000336274	2212|7450|695|2207|1277|5742|113|54518
Osteoclast differentiation	hsa04380	8	132	0.000116028	0.000552985	1436|2212|140885|7305|54209|695|6688|1536
Regulation of actin cytoskeleton	hsa04810	10	215	0.000137688	0.000642542	3689|2335|3683|1730|3071|3678|5880|7409|80310|3676
PPAR signaling pathway	hsa03320	6	72	0.000167072	0.000763759	948|2173|123|2171|6319|51129
Toll-like receptor signaling pathway	hsa04620	7	106	0.000188054	0.000842482	958|6352|51284|4283|23643|3627|7098
Metabolic pathways	hsa01100	27	1243	0.000420831	0.00184836	79888|1890|5742|259307|230|47|337876|10993|284716|5169|7941|3939|7298|3620|240|56901|100|5836|5214|4837|9514|2026|6472|1573|3099|80270|84701
Fructose and mannose metabolism	hsa00051	4	33	0.000581295	0.00250404	5214|3099|230|5210
NF-kappa B signaling pathway	hsa04064	6	93	0.000607141	0.00256603	958|3383|695|10673|23643|330
Cytosolic DNA-sensing pathway	hsa04623	5	64	0.000774392	0.00321229	9447|29108|6352|834|3627
Central carbon metabolism in cancer	hsa05230	5	67	0.000939905	0.00375962	5214|6513|3939|5163|3099
Glycolysis / Gluconeogenesis	hsa00010	5	67	0.000939905	0.00375962	230|2026|3099|3939|5214
p53 signaling pathway	hsa04115	5	69	0.00106397	0.00418121	5054|894|595|1643|3486
Fat digestion and absorption	hsa04975	4	41	0.00122835	0.00474397	19|338|948|949
Biosynthesis of amino acids	hsa01230	5	75	0.00150929	0.00573017	6472|2026|230|10993|5214
Carbon metabolism	hsa01200	6	113	0.00158103	0.00590252	6472|10993|2026|3099|230|5214
ABC transporters	hsa02010	4	45	0.00169067	0.00610824	19|6890|8714|9619
Ether lipid metabolism	hsa00565	4	45	0.00169067	0.00610824	5168|79888|7941|9514
Bacterial invasion of epithelial cells	hsa05100	5	78	0.00177725	0.0063191	3678|857|858|2335|3059
Viral carcinogenesis	hsa05203	8	205	0.00186046	0.00651162	894|718|3106|85236|3135|3134|3133|595
Ovarian steroidogenesis	hsa04913	4	50	0.00242283	0.00834944	1573|240|113|949
Protein digestion and absorption	hsa04974	5	90	0.00320552	0.0108793	1284|1290|1277|50509|1282
Ras signaling pathway	hsa04014	8	228	0.00348968	0.011667	1436|2321|5228|51365|5880|80310|285|7422
Fc gamma R-mediated phagocytosis	hsa04666	5	93	0.00366352	0.0120681	2212|4082|5880|7409|1794
NOD-like receptor signaling pathway	hsa04621	4	57	0.00377688	0.0122319	29108|6352|330|834
Measles	hsa05162	6	136	0.00382246	0.0122319	51284|3560|894|3310|915|595
MicroRNAs in cancer	hsa05206	9	299	0.00528931	0.0166874	4082|894|54541|3678|7431|595|6624|3162|7422
Pancreatic cancer	hsa05212	4	66	0.00616924	0.0191932	7039|5880|595|7422
Renal cell carcinoma	hsa05211	4	67	0.00648489	0.0198988	7039|6513|7422|112399
Fc epsilon RI signaling pathway	hsa04664	4	68	0.00681106	0.0206173	695|7409|5880|2207
Insulin resistance	hsa04931	5	109	0.00692488	0.0206823	5836|5507|6513|57761|948
Proteoglycans in cancer	hsa05205	7	205	0.00704423	0.0207619	857|595|2335|858|3678|7422|3059
African trypanosomiasis	hsa05143	3	35	0.00720145	0.0209497	3620|3383|3910
Jak-STAT signaling pathway	hsa04630	6	158	0.0076201	0.0218834	3560|53833|894|3587|9180|595
Bile secretion	hsa04976	4	71	0.00785416	0.02227	6513|8714|113|949
Bladder cancer	hsa05219	3	41	0.0108002	0.0302405	1890|595|7422
AMPK signaling pathway	hsa04152	5	125	0.011814	0.0326708	5214|6319|595|5210|948
EGFR tyrosine kinase inhibitor resistance	hsa01521	4	81	0.0120711	0.0329746	7039|7422|558|80310
Cysteine and methionine metabolism	hsa00270	3	45	0.0136819	0.0369247	259307|3939|10993
Apoptosis	hsa04210	5	140	0.0181516	0.0484042	4001|5551|1520|330|3002

## Sheet: Down_KEGG
Term	ID	Input number	Background number	P-value	Corrected P-Value	Input
Metabolic pathways	hsa01100	103	1243	1.24793e-47	2.82033e-45	2710|55349|57134|8309|9365|219|130|130589|7386|7384|2525|4697|7306|51268|51179|8659|26275|124975|549|23475|1491|126|27124|3242|6652|3033|55224|6296|84706|55753|4329|594|316|4128|9380|5091|5096|525|8801|8802|84735|127124|445|384|3158|1644|38|4051|30|36|79814|34|84812|50617|64902|255189|26227|53354|2053|2203|4942|1582|1586|7263|113675|189|123876|10402|635|112817|245973|245972|1591|229|5106|5105|108…
Carbon metabolism	hsa01200	22	113	9.9975e-18	8.24593e-16	4329|29968|2731|9104|51179|34|1892|2203|48|5091|5096|26275|8801|8802|113675|189|229|38|5224|84706|55753|26227
Valine, leucine and isoleucine degradation	hsa00280	17	48	1.09459e-17	8.24593e-16	4329|26275|38|594|3158|5019|30|316|5096|34|36|64902|18|219|3033|549|1892
Glycine, serine and threonine metabolism	hsa00260	15	40	4.58125e-16	2.58841e-14	29968|23464|55349|635|51268|1610|5224|1491|4128|64902|113675|9380|189|26227|2731
Butanoate metabolism	hsa00650	10	28	5.597e-11	2.52984e-09	38|79944|5019|348158|3033|18|3158|123876|1892|6296
Propanoate metabolism	hsa00640	10	32	1.66077e-10	6.25558e-09	4329|38|594|18|5096|34|26275|8801|8802|1892
Arginine and proline metabolism	hsa00330	11	50	4.96733e-10	1.60374e-08	4128|1160|58510|112817|4942|1610|219|8659|384|79814|84735
Collecting duct acid secretion	hsa04966	9	27	8.61473e-10	2.43366e-08	6521|1188|525|760|127124|245973|245972|50617|155066
Fatty acid degradation	hsa00071	10	44	2.34018e-09	5.87646e-08	38|30|36|3033|1579|130|126|219|34|1892
Aldosterone-regulated sodium reabsorption	hsa04960	9	39	1.33127e-08	3.00868e-07	23327|6340|4306|3758|53828|6337|476|6338|3291
Tryptophan metabolism	hsa00380	9	40	1.61162e-08	3.31114e-07	1545|4128|1644|316|3033|38|219|55753|1892
Glyoxylate and dicarboxylate metabolism	hsa00630	8	28	2.08775e-08	3.74209e-07	38|9380|112817|48|51179|5096|189|2731
Biosynthesis of amino acids	hsa01230	11	75	2.15253e-08	3.74209e-07	29968|48|5091|445|5224|1491|384|229|113675|84706|26227
beta-Alanine metabolism	hsa00410	8	31	4.09809e-08	6.61549e-07	4329|1807|18|34|26275|1892|219|84735
Glycolysis / Gluconeogenesis	hsa00010	10	67	8.15312e-08	1.2284e-06	2203|126|5224|2538|130|229|130589|219|5106|5105
Protein digestion and absorption	hsa04974	11	90	1.16816e-07	1.56913e-06	1285|4311|1286|3769|1288|11136|117247|7512|23428|476|9056
Mineral absorption	hsa04978	9	52	1.18032e-07	1.56913e-06	140803|4501|4496|4495|4494|4493|7421|476|4499
PPAR signaling pathway	hsa03320	10	72	1.498e-07	1.88083e-06	2710|1582|30|11001|34|2168|3158|5106|8309|5105
Pyruvate metabolism	hsa00620	8	40	2.26214e-07	2.69076e-06	38|9380|5091|134526|219|197257|5106|5105
Complement and coagulation cascades	hsa04610	10	79	3.27592e-07	3.70179e-06	3827|5340|730|5327|5624|624|727|5104|2152|5328
Peroxisome	hsa04146	10	83	4.96299e-07	5.34112e-06	2053|5264|26061|51268|30|11001|51179|1610|189|8309
Citrate cycle (TCA cycle)	hsa00020	7	30	5.29167e-07	5.43599e-06	55753|48|5091|8801|8802|5106|5105
Drug metabolism - cytochrome P450	hsa00982	9	69	1.01541e-06	9.97746e-06	2330|4128|2326|2329|316|119391|130|126|2947
Tyrosine metabolism	hsa00350	7	35	1.30892e-06	1.23257e-05	1644|4128|7306|3242|316|130|126
Proximal tubule bicarbonate reclamation	hsa04964	6	23	2.01513e-06	1.82167e-05	762|760|476|1468|5106|5105
Oxidative phosphorylation	hsa00190	11	133	4.10709e-06	3.57001e-05	479|4697|64077|245972|127124|245973|525|50617|155066|7386|7384
Endocrine and other factor-regulated calcium reabsorption	hsa04961	7	47	7.48328e-06	6.26378e-05	793|624|9365|476|5745|7421|3816
Lysine degradation	hsa00310	7	52	1.36096e-05	0.000109849	8424|38|51268|219|3033|55753|1892
Alanine, aspartate and glutamate metabolism	hsa00250	6	35	1.6654e-05	0.000129786	18|445|8659|64902|84706|189
Pentose and glucuronate interconversions	hsa00040	6	36	1.92115e-05	0.000144727	9365|6652|219|51181|51084|27294
Histidine metabolism	hsa00340	5	24	3.79339e-05	0.00027655	219|10841|4128|84735|1644
Phagosome	hsa04145	10	155	8.16344e-05	0.000565808	79861|525|78989|347733|127124|245973|245972|50617|22925|155066
Fatty acid metabolism	hsa01212	6	48	8.2618e-05	0.000565808	38|30|36|3033|34|1892
Metabolism of xenobiotics by cytochrome P450	hsa00980	7	73	9.95991e-05	0.000662041	1545|22977|119391|27294|130|126|2947
Vibrio cholerae infection	hsa05110	6	51	0.000112228	0.000724675	525|127124|245973|245972|50617|155066
Phenylalanine metabolism	hsa00360	4	17	0.000156982	0.000985498	3242|10249|4128|1644
Tight junction	hsa04530	9	139	0.000179215	0.00109466	64398|149461|9071|57530|57619|4628|10686|27134|9073
Synaptic vesicle cycle	hsa04721	6	63	0.000323996	0.00192692	525|127124|245973|245972|50617|155066
Rheumatoid arthritis	hsa05323	7	91	0.000353105	0.0020462	525|50617|127124|245973|245972|6387|155066
Retinol metabolism	hsa00830	6	65	0.000378499	0.00213852	316|1579|130|126|145226|8854
Epithelial cell signaling in Helicobacter pylori infection	hsa05120	6	68	0.000473397	0.00260946	525|127124|245973|245972|50617|155066
Cysteine and methionine metabolism	hsa00270	5	45	0.00053757	0.00289264	1491|64902|635|7263|113675
Bile secretion	hsa04976	6	71	0.000585867	0.00307921	8431|760|5243|9376|476|10864
Synthesis and degradation of ketone bodies	hsa00072	3	10	0.000612541	0.00314623	5019|38|3158
Glucagon signaling pathway	hsa04922	7	102	0.000670937	0.00336959	2203|10891|5224|2538|5106|2642|5105
Gastric acid secretion	hsa04971	6	74	0.000718039	0.00352776	3772|3766|3758|760|115111|476
Cardiac muscle contraction	hsa04260	6	78	0.000928814	0.00446621	7139|476|4634|7386|7134|7384
Cell adhesion molecules (CAMs)	hsa04514	8	146	0.00114243	0.00537893	149461|9071|22854|79679|10686|1272|1001|9073
Arachidonic acid metabolism	hsa00590	5	62	0.00203597	0.00939039	1579|2053|255189|5730|4051
Pantothenate and CoA biosynthesis	hsa00770	3	18	0.00263125	0.0118932	1807|53354|5167
Regulation of actin cytoskeleton	hsa04810	9	215	0.00336022	0.0147853	624|85477|26999|56924|5217|1950|4628|2246|2254
Steroid biosynthesis	hsa00100	3	20	0.00343513	0.0147853	7108|1594|1591
Axon guidance	hsa04360	8	176	0.00346734	0.0147853	9353|80031|5364|22854|56924|6387|655|658
Endocytosis	hsa04144	10	260	0.00365596	0.0153009	23327|3815|55616|2348|55040|3306|1950|6456|2352|2066
Arginine biosynthesis	hsa00220	3	21	0.00388729	0.01593	84706|384|445
Transcriptional misregulation in cancer	hsa05202	8	180	0.00394726	0.01593	3248|9915|7490|5087|7113|5327|8842|5328
Insulin resistance	hsa04931	6	109	0.00455426	0.0180573	11001|5106|10891|2538|27330|5105
Vitamin B6 metabolism	hsa00750	2	6	0.00472294	0.0184032	29968|316
Chemical carcinogenesis	hsa05204	5	82	0.00627308	0.0240291	2947|1545|119391|126|130
Taste transduction	hsa04742	5	83	0.00657963	0.0247833	6340|6337|6338|2555|5136
Ascorbate and aldarate metabolism	hsa00053	3	27	0.00735016	0.0272317	55586|9104|219
GABAergic synapse	hsa04727	5	88	0.00827098	0.0301491	10243|18|5334|23710|2555
PI3K-Akt signaling pathway	hsa04151	11	342	0.00842684	0.0302296	1285|5618|1286|3815|1288|2538|1950|2246|2254|5106|5105
Pentose phosphate pathway	hsa00030	3	29	0.00880483	0.0310921	9104|2203|229
Nicotinate and nicotinamide metabolism	hsa00760	3	30	0.00959075	0.0333463	23475|316|5167
Fructose and mannose metabolism	hsa00051	3	33	0.0121874	0.0417327	2203|6652|229
Calcium signaling pathway	hsa04020	7	180	0.0132283	0.0446209	624|84812|5731|5136|292|7134|2066
AGE-RAGE signaling pathway in diabetic complications	hsa04933	5	101	0.0140272	0.0466198	84812|1285|1286|1288|2152
